# Supplementary material for: Formation of i -motif structure at neutral and slightly alkaline pH
Source: Royal Society of Chemistry journal article supplement (doi:10.1039/b919600e), 2009-12-14
Supplement: b919600e.pdf [file b919600e.pdf]

## Supporting Information

### Formation of i-motif structure at neutral and slightly alkaline pH

Jun Zhou,<sup>a,b</sup> Chunying Wei,<sup>c</sup> Guoqing Jia,<sup>a,b</sup> Xiuli Wang,<sup>a,b</sup> Zhaochi Feng,<sup>a</sup> and Can Li<sup>\*a</sup>

<sup>a</sup>*State Key Laboratory of Catalysis, Dalian Institute of Chemical Physics, Chinese Academy of Sciences, Dalian 116023, China.*

<sup>b</sup>*Graduate School of Chinese Academy of Sciences, Beijing 100039, China.*

<sup>c</sup>*Key Laboratory of Chemical Biology and Molecular Engineering of Ministry of Education, Institute of Molecular Science, Shanxi University, Taiyuan 030006, China.*

\*Corresponding author. State Key Laboratory of Catalysis, Dalian Institute of Chemical Physics, Chinese Academy of Sciences, Dalian 116023, China. Tel.: 86-411-84379070. Fax: 86-411-84694447. Web site: <http://www.canli.dicp.ac.cn>  
Email: [canli@dicp.ac.cn](mailto:canli@dicp.ac.cn)

**Fig. S1**

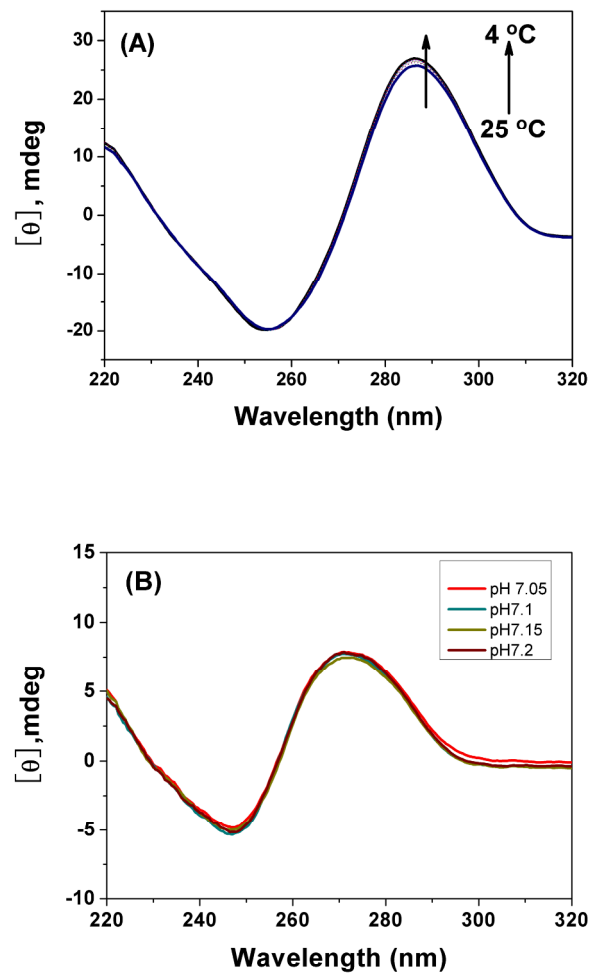

**Fig. S1** Circular dichroism spectra of HT recorded at different temperatures at pH 5.0 (A), and at 25 °C with different pH (B) in 10 mM cacodylate buffer.

**Fig. S2**

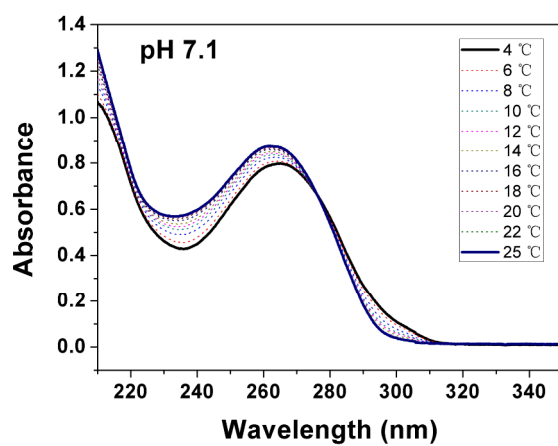

**Fig. S2** UV absorption spectra of HT in 10 mM cacodylate buffer at pH 7.1 as a function of temperature.

**Fig. S3**

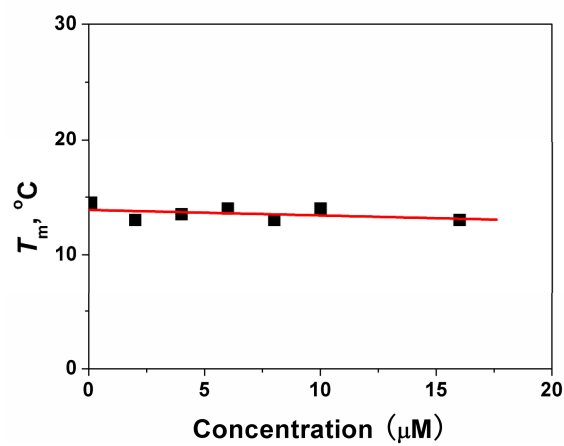

**Fig. S3**  $T_m$  of HT at different strand concentration monitored by fluorescence (0.1  $\mu\text{M}$ ) and CD (2-16  $\mu\text{M}$ ) melting method (pH 7.0).

**Fig. S4**

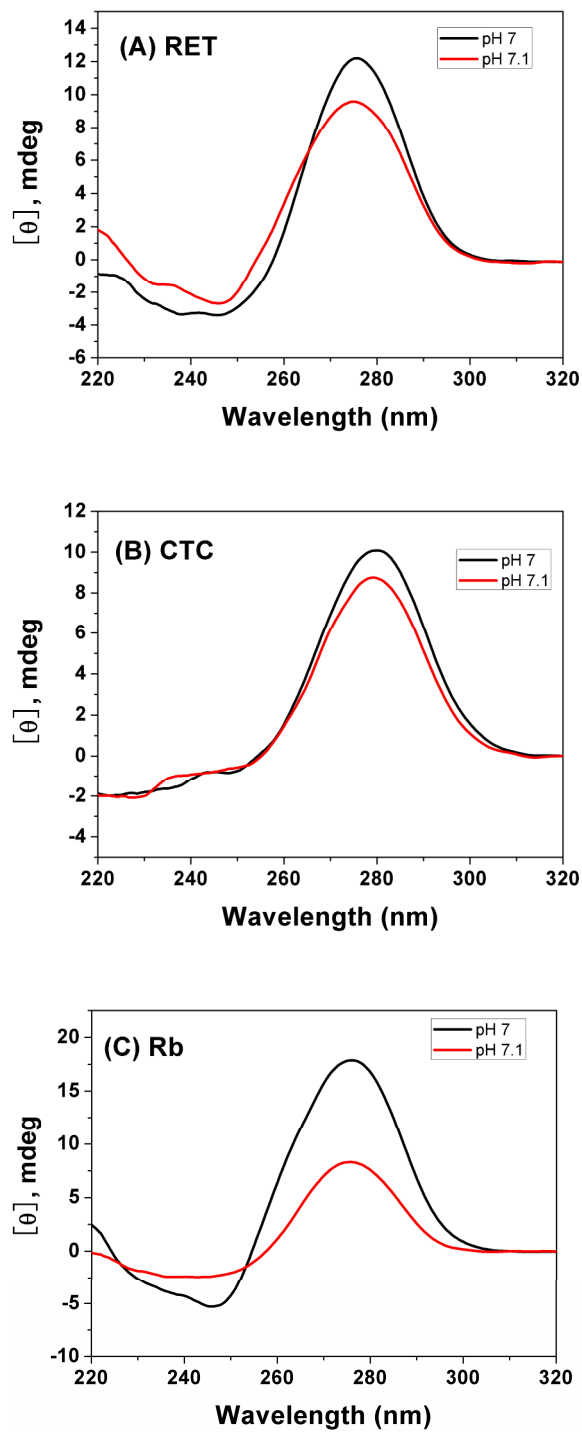

**Fig. S4.** Circular dichroism spectra of RET (A), CTC (B) and Rb (C) recorded at 25°C with pH 7.0 (black) and 7.1 (red) in 10 mM cacodylate buffer.
